# Supplementary material for: Independent and interacting value systems for reward and information in the human brain
Source: eLife. 2022 Apr 13;11:e66358. doi: 10.7554/eLife.66358 (PMC9064296; doi:10.7554/eLife.66358)
Supplement: Supplementary file 4. — The table shows the 17 GLMs adopted in the fMRI data analysis all referring to activity associated with the onset of the first-free-choice trial. GLM0 and 5 are the univariate analyses, whereas the other GLMs relate with the model-based analysis. [file elife-66358-supp4.docx]

Supplementary file 4. *GLMs for fMRI data.*

| **NAME** | **REGRESSORS** |
| --- | --- |
| GLM0 | [Highest Reward choice; Lower Reward choice] |
| GLM0relexp |  |
| GLM0exprel |  |
| GLM0rew |  |
| GLM1 |  |
| GLM1bis |  |
| GLM2 |  |
| GLM3 |  |
| GLM3bis |  |
| GLM4 |  |
| GLM4bis |  |
| GLM4rew |  |
| GLM4diff |  |
| GLM5 |  |
| GLM6 |  |
| GLM7 |  |
| GLM8 |  |
|  |  |
